# Supplementary material
Source: publisher figshare collection journal article supplement (https://acs.figshare.com/ndownloader/files/16873100)
Supplement: Supplementary file 1 [file 16873100]

## Supporting Information

# Light Trapping in Conformal Graphene/Silicon Nanoholes for High Performance Photodetectors

*Jun Yang<sup>1,2</sup>, Linlong Tang<sup>1,\*</sup>, Wei Luo<sup>1</sup>, Jun Shen<sup>1</sup>, Dahua Zhou<sup>1</sup>, Shuanglong Feng<sup>1</sup>,  
Xingzhan Wei<sup>1,\*</sup> and Haofei Shi<sup>1</sup>*

<sup>1</sup> Chongqing Key Laboratory of Multi-scale Manufacturing Technology, Chongqing Institute of Green and Intelligent Technology, Chinese Academy of Sciences, Chongqing 400714, P.R. China.

<sup>2</sup> University of Chinese Academy of Sciences, Beijing, 100049, P.R. China

### Corresponding Author

\* Prof. Xingzhan Wei, E-mail address: weixingzhan@cigit.ac.cn

\* Dr. Linlong Tang, E-mail address: tll@cigit.ac.cn

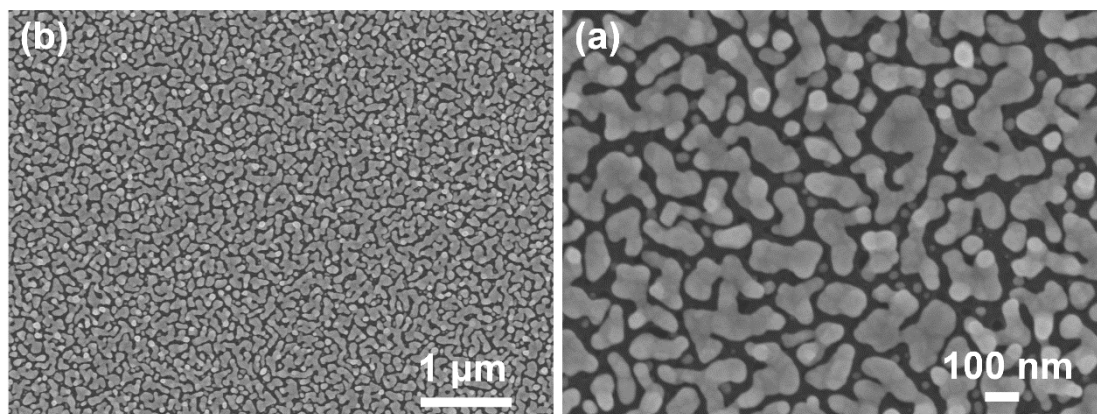

**Figure S1.** Low (a) and high (b) magnification SEM images of the silver nanoparticles.

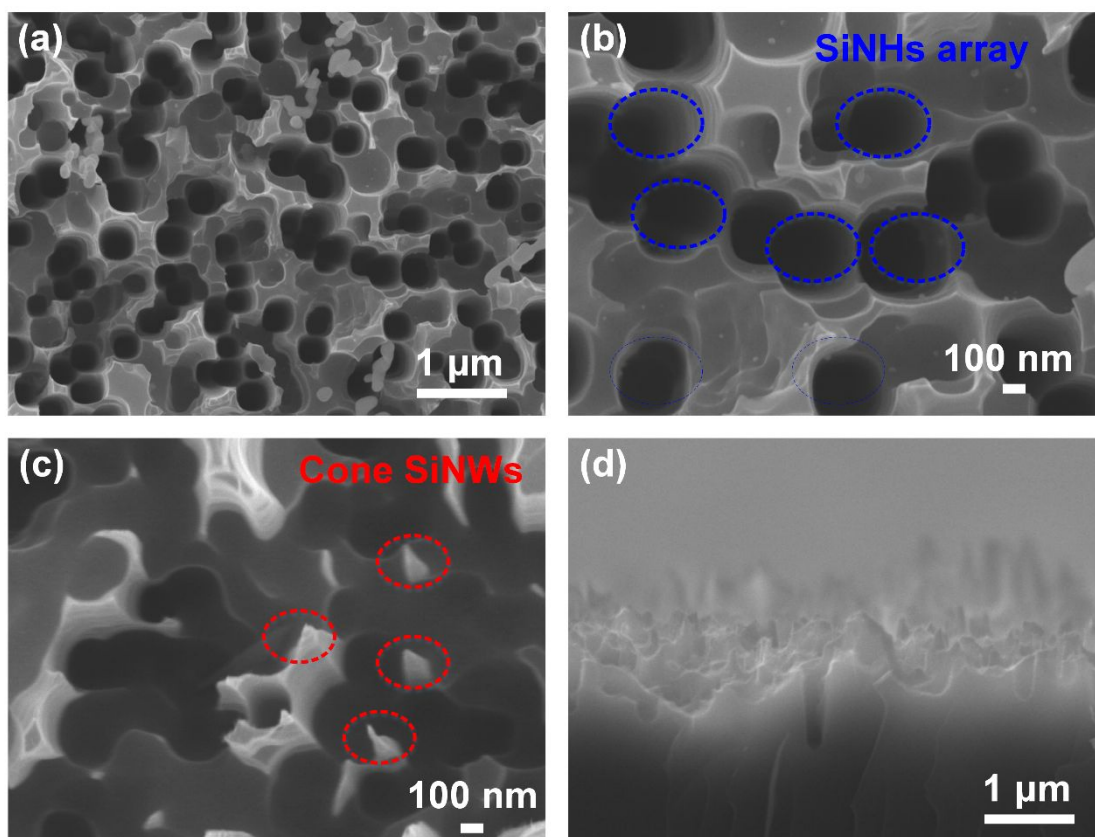

**Figure S2.** SEM images of silicon nanoholes with low (a) and high (b) magnification,. (c) SEM images of the Si nanocones above the SiNHs arrays; (d) Cross-sectional SEM image of the SiNHs combined with Si nanocones arrays.

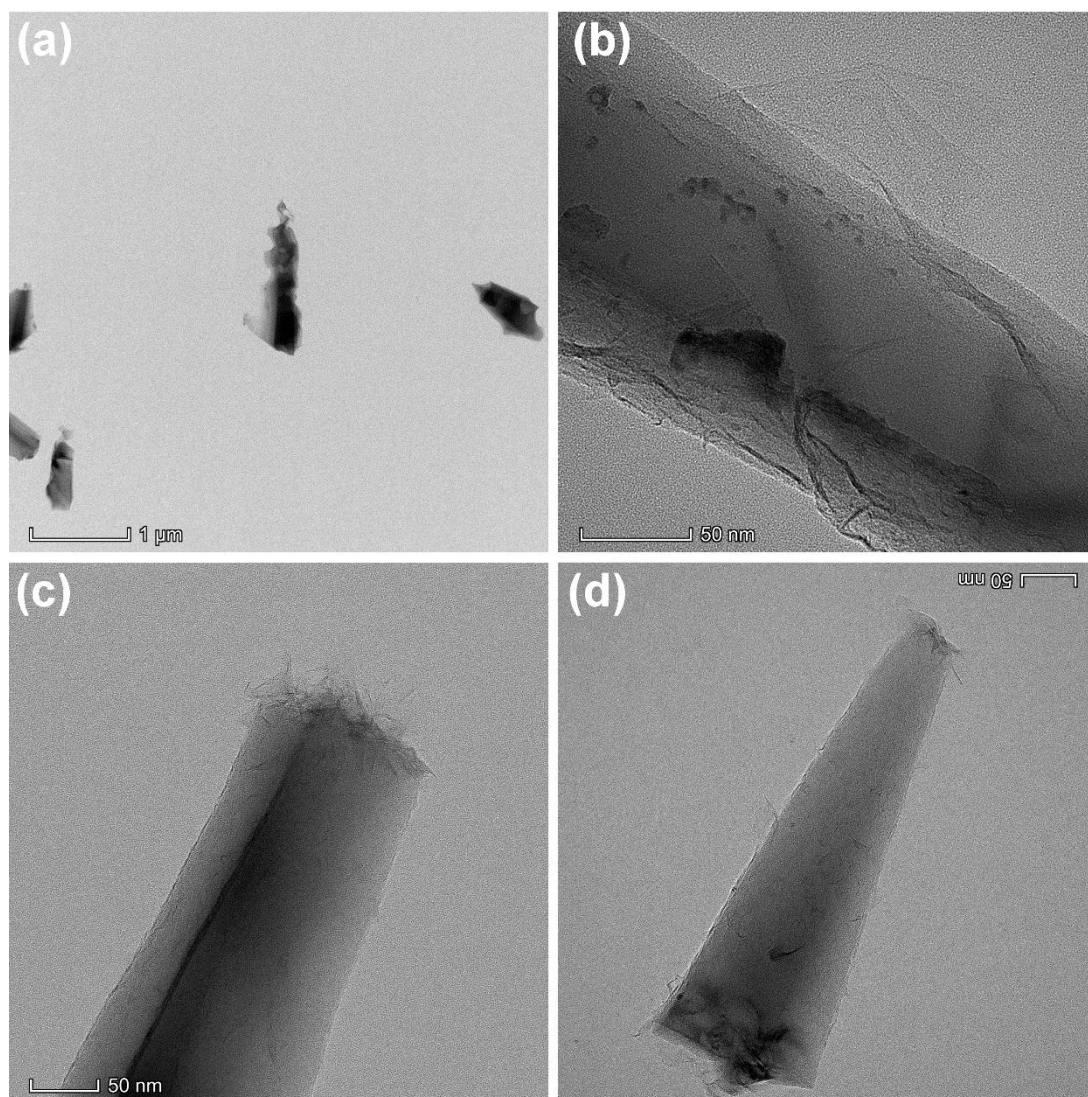

**Figure S3.** TEM images of graphene on the silicon nanostructures. (a)-(d) TEM samples of the conformal graphene on silicon nanostructures via mechanically scratching.

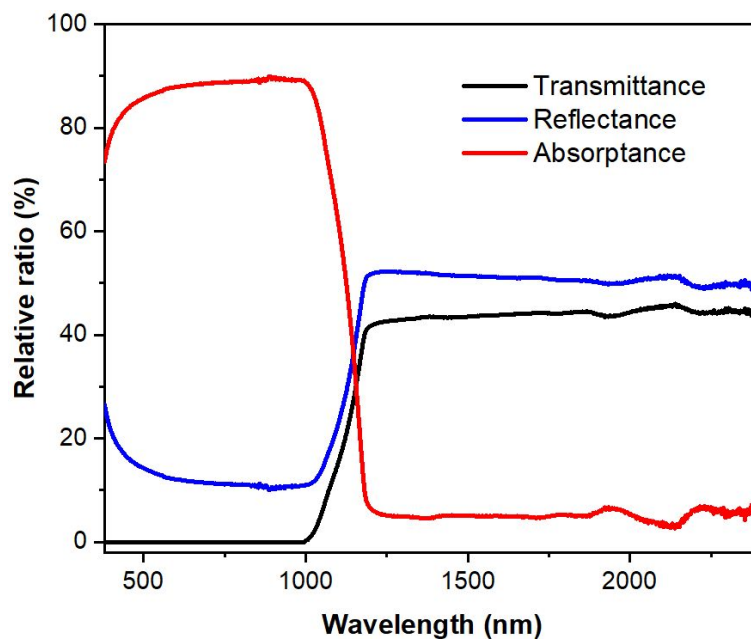

**Figure S4.** Transmittance, reflectance and absorptance of a SiNHs/Graphene sample.

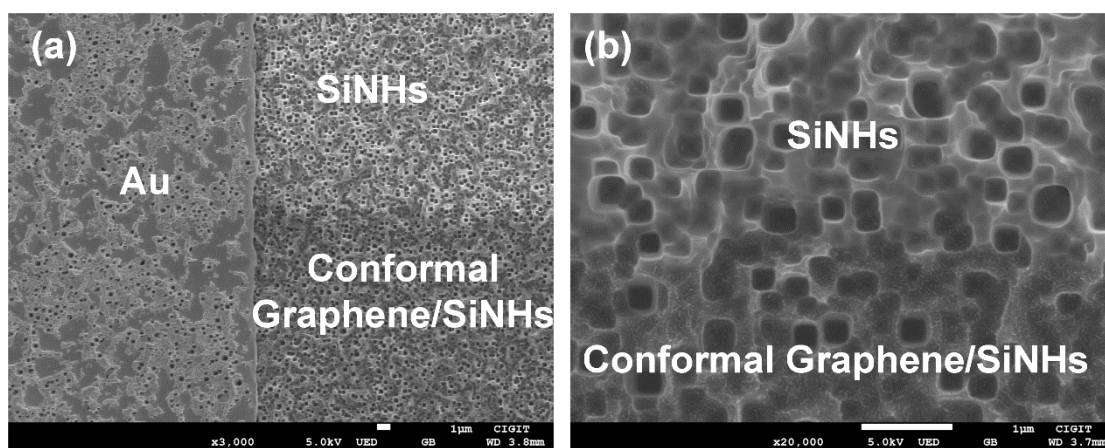

**Figure S5.** SEM images of the photodetector based on conformal graphene/SiNHs. (a) The neighboring region of the Au electrode, SiNHs substrate and conformal graphene/SiNHs; (b) High-magnification SEM image of the etched conformal graphene on SiNHs substrates.



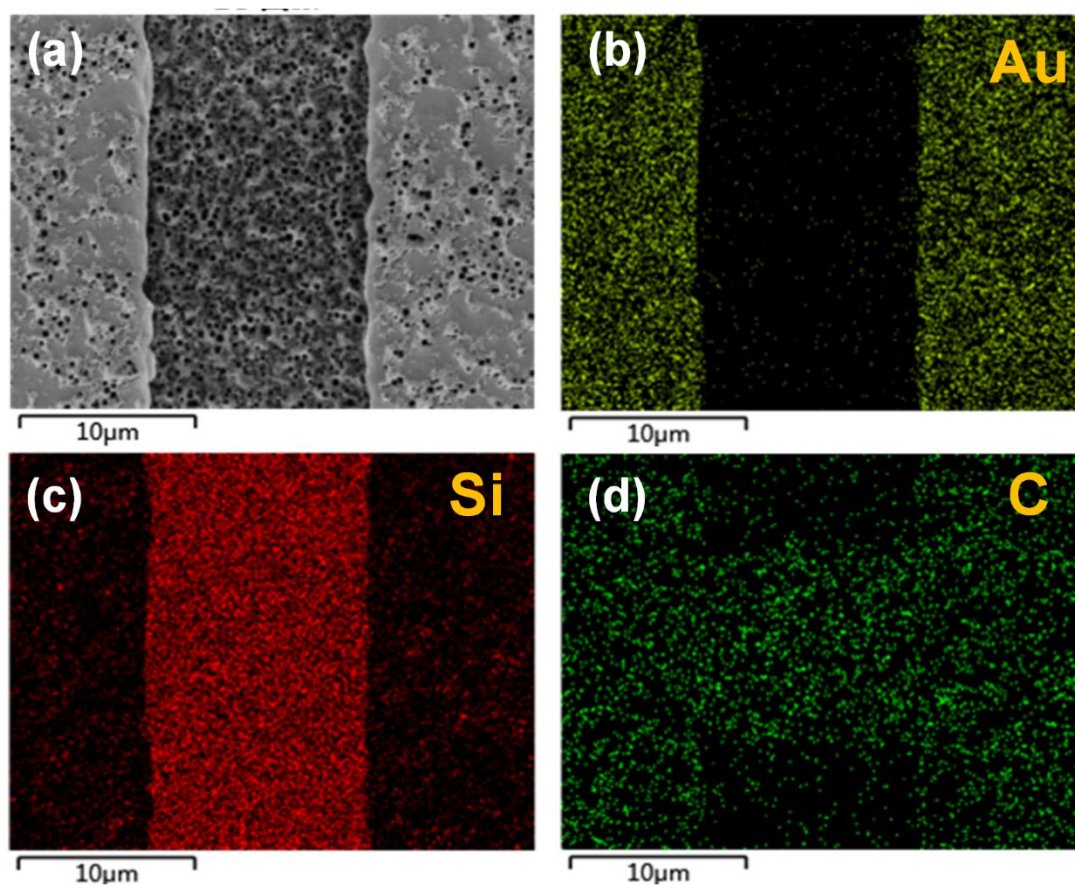

**Figure S6.** EDS mapping images of the photodetector channel based on conformal graphene/SiNHs. (a) SEM image of the photodetector channel; (b)-(d) Element mapping images of Au, Si and C, respectively.

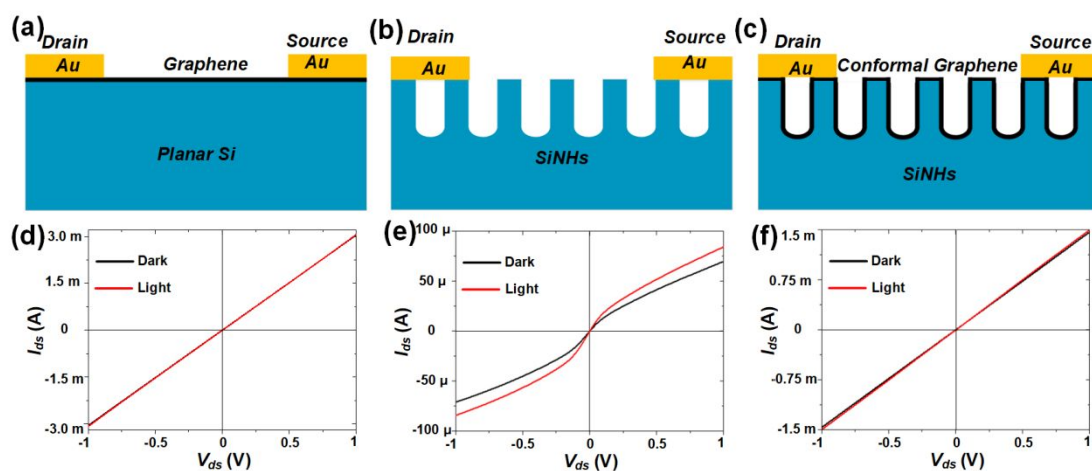

**Figure S7.** Electrical characteristics of the photodetectors in photoconductor mode. (a)-(c) Schematic diagrams of photodetector based on planar graphene/Si, SiNHs arrays and conformal graphene/SiNHs, respectively. (d)-(f) The I-V curves of photodetectors based on planar graphene/Si detector, SiNHs and conformal graphene/SiNHs.

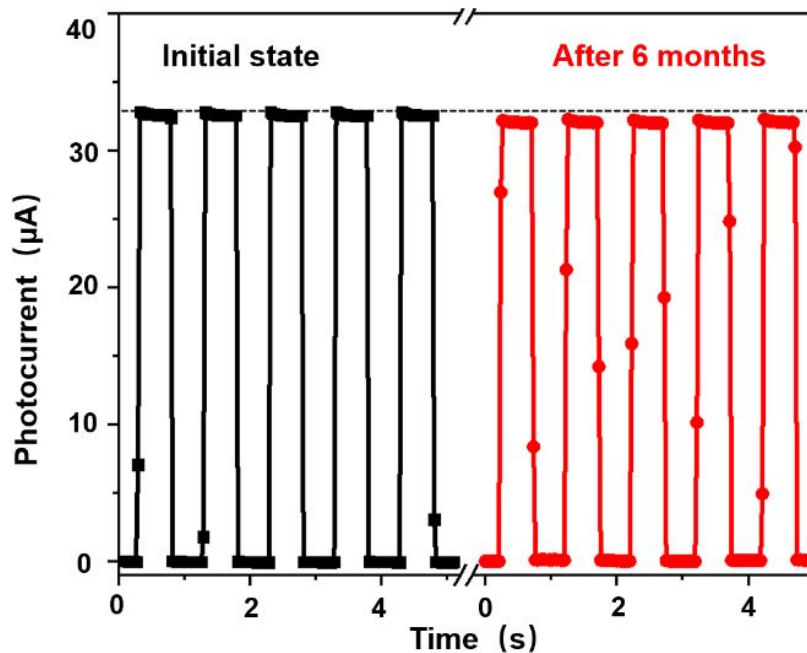

**Figure S8.** Photoresponse of the conformal graphene/SiNHs photodetector before and after exposing it in air for 6 months.

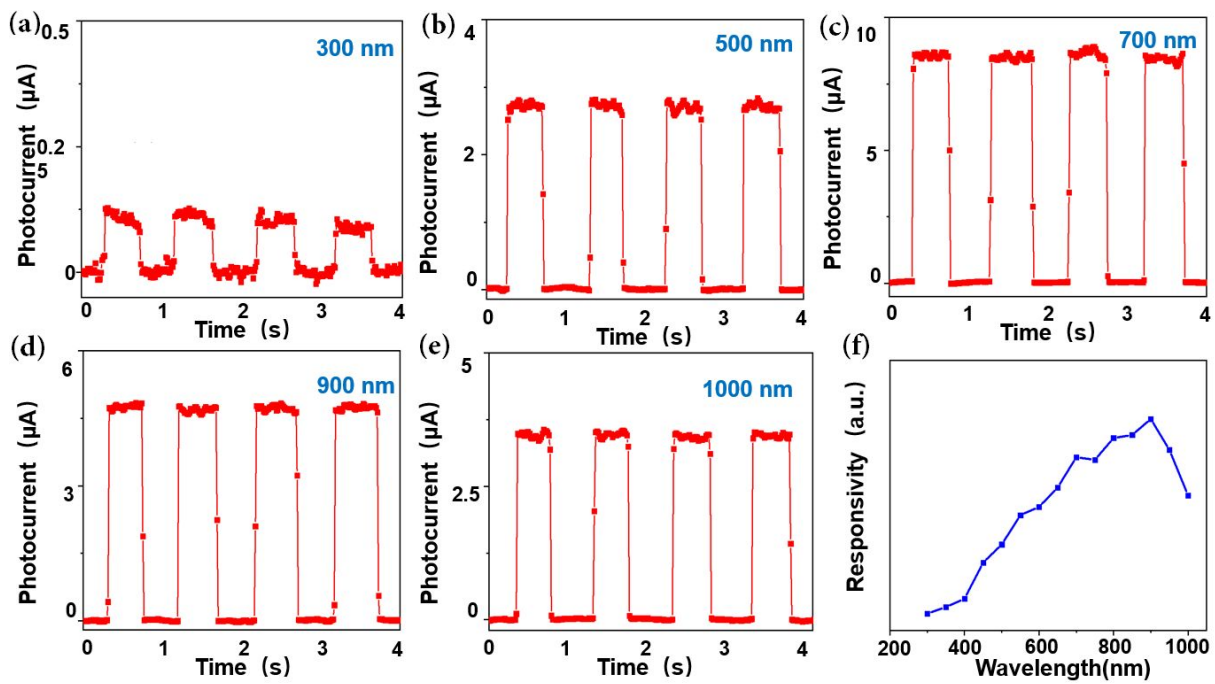

**Figure S9.** (a)-(e) Photoresponse of the conformal graphene/SiNHs photodetector in the range of 300-1000nm, (f) Normalized responsivity versus wavelength.

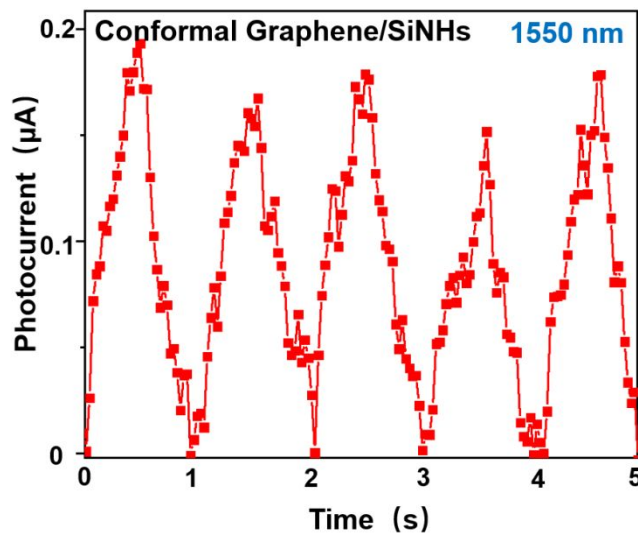

**Figure S10.** Photoresponse of the conformal graphene/SiNHs detector at 1550 nm.



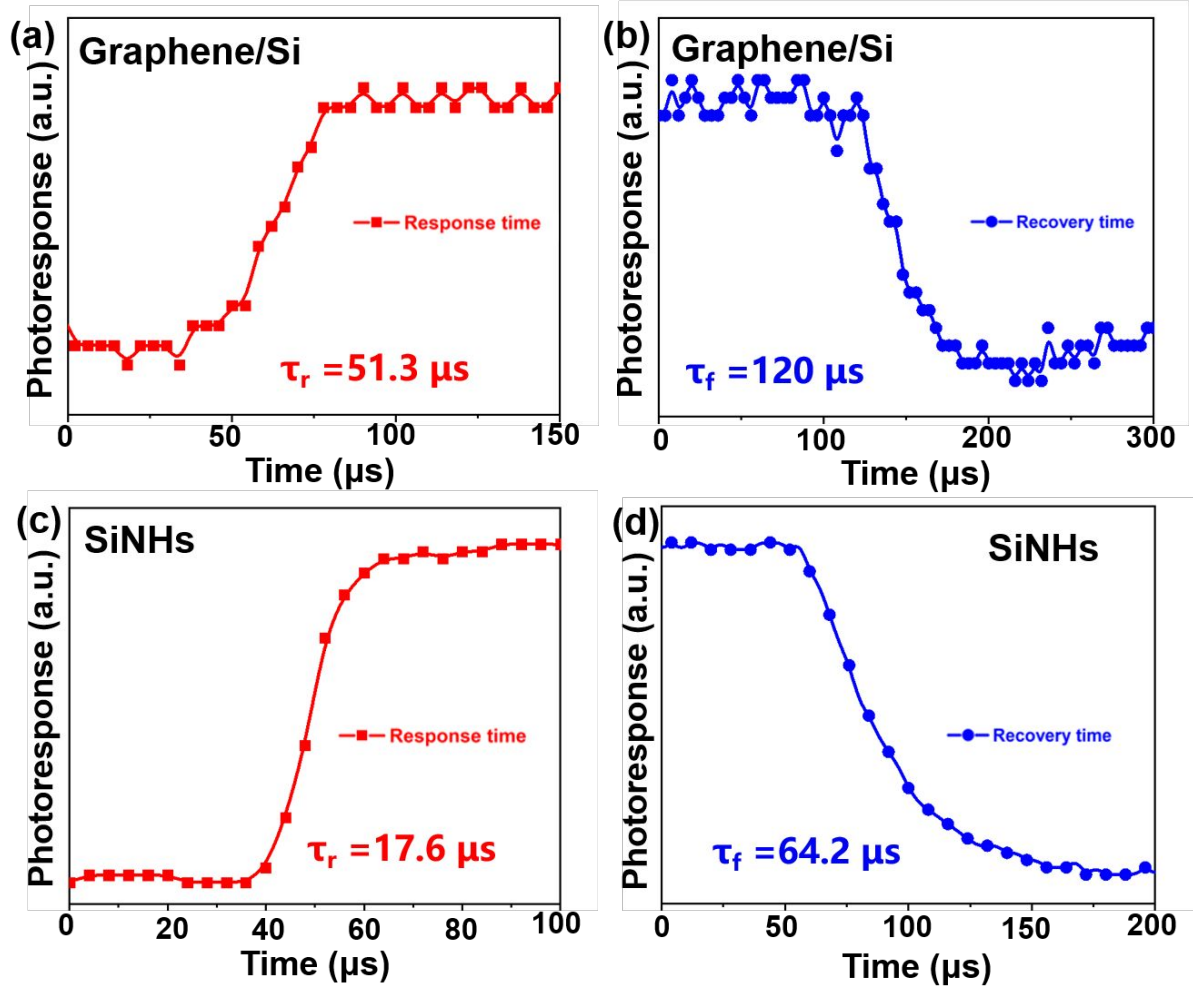

**Figure S11.** Response speeds of different photodetectors. (a)-(b) Rise time  $\tau_r$  and recovery time  $\tau_f$  of the planar graphene/Si based photodetector; (c)-(d) Rise time  $\tau_r$  and recovery time  $\tau_f$  of the SiNHs based photodetector.

**Table S1** Comparison of Graphene/Si photodetector performance

| Device                          | Mechanism              | Responsivity                         | Response time | Detectivity (cm Hz <sup>-1/2</sup> W <sup>-1</sup> ) | Ref             |
|---------------------------------|------------------------|--------------------------------------|---------------|------------------------------------------------------|-----------------|
| Graphene/n-Si                   | Photoconductive        | 10 <sup>6</sup> ~10 <sup>7</sup> A/W | 1.8 ms        | -                                                    | 1               |
| Graphene/SiO <sub>2</sub> /n-Si | Photoconductive        | 1000 A/W                             | 400 ns        | 1.1×10 <sup>10</sup> (Measured)                      | 2               |
| Graphene/p-Si                   | Photoconductive        | 10 <sup>4</sup> A/W                  | 6 μs          | -                                                    | 3               |
| Graphene/Si on insulator        | Photovoltaic           | 0.23 A/W                             | 20 ns         | 7.83×10 <sup>10</sup> (Measured)                     | 4               |
| Graphene nanowalls/n-Si         | Photovoltaic           | 0.52 A/W                             | 40 μs         | 5.88×10 <sup>13</sup> (Measured)                     | 5               |
| <b>Conformal graphene/SiNHs</b> | <b>Photoconductive</b> | <b>2720 A/W</b>                      | <b>6.2 μs</b> | <b>1.25×10<sup>11</sup> (Calculated)</b>             | <b>Our work</b> |

## Reference

- (1) Liu, F.; Kar, S. Quantum Carrier Reinvestment-Induced Ultrahigh and Broadband Photocurrent Responses in Graphene–Silicon Junctions. *ACS Nano* **2014**, *8* (10), 10270-10279, DOI: 10.1021/nn503484s.
- (2) Guo, X.; Wang, W.; Nan, H.; Yu, Y.; Jiang, J.; Zhao, W.; Li, J.; Zafar, Z.; Xiang, N.; Ni, Z.; Hu, W.; You, Y.; Ni, Z. High-performance graphene photodetector using interfacial gating. *Optica* **2016**, *3* (10), 1066-1070, DOI: 10.1364/OPTICA.3.001066.
- (3) Chen, Z.; Cheng, Z.; Wang, J.; Wan, X.; Shu, C.; Tsang, H. K.; Ho, H. P.; Xu, J.-B. High Responsivity, Broadband, and Fast Graphene/Silicon Photodetector in Photoconductor Mode. *Advanced Optical Materials* **2015**, *3* (9), 1207-1214, DOI: 10.1002/adom.201500127.
- (4) Selvi, H.; Hill, E. W.; Parkinson, P.; Echtermeyer, T. J. Graphene–silicon-on-insulator (GSOI) Schottky diode photodetectors. *Nanoscale* **2018**, *10* (40), 18926-18935, DOI: 10.1039/C8NR05285A.
- (5) Shen, J.; Liu, X.; Song, X.; Li, X.; Wang, J.; Zhou, Q.; Luo, S.; Feng, W.; Wei, X.; Lu, S.; Feng, S.; Du, C.; Wang, Y.; Shi, H.; Wei, D. High-performance Schottky heterojunction photodetector with directly grown graphene nanowalls as electrodes. *Nanoscale* **2017**, *9* (18), 6020-6025, DOI: 10.1039/C7NR00573C.
